# Supplementary material for: Differential expression profile of gluten-specific T cells identified by single-cell RNA-seq
Source: PubMed Central journal article supplement (PMC8496852; doi:10.1371/journal.pone.0258029), 2021-10-07
Supplement: pone.0258029.s012.pdf [file pone.0258029.s012.pdf]

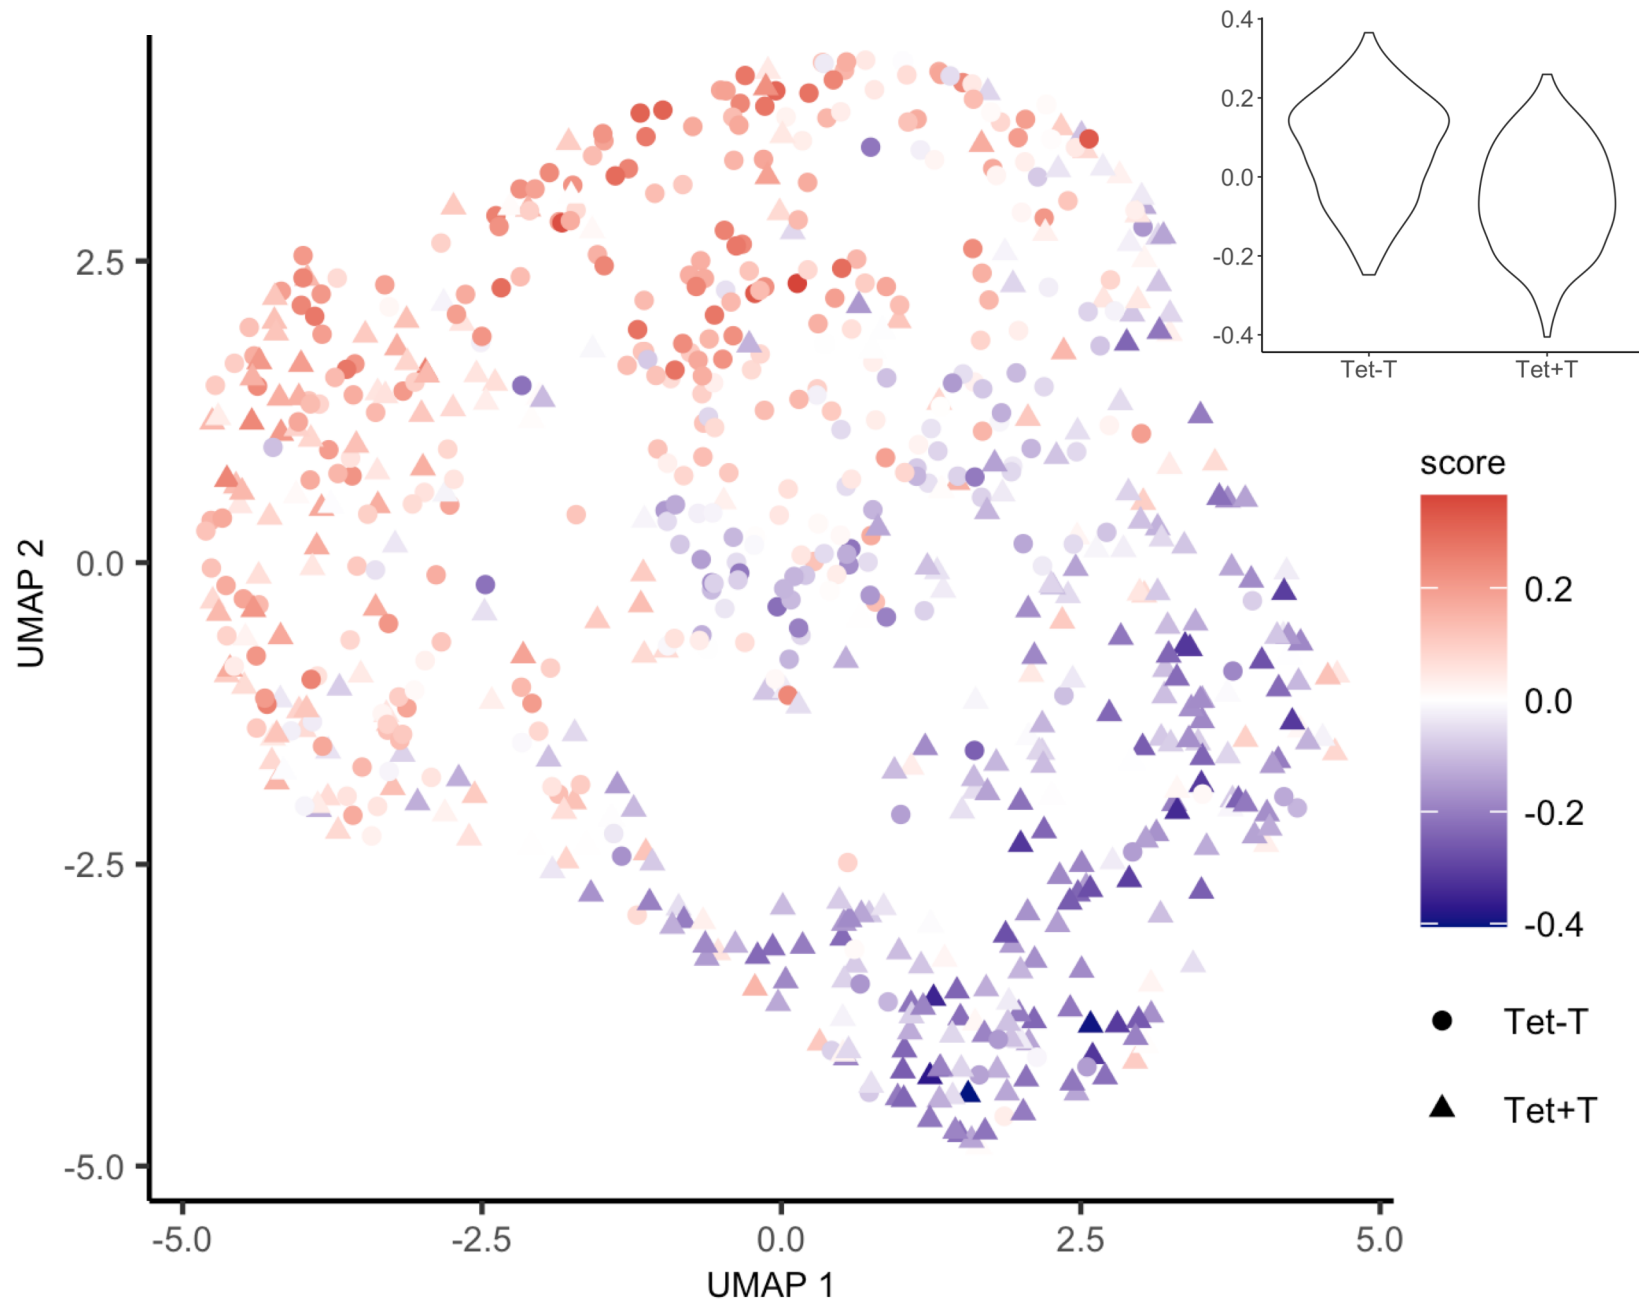

S\_Fig 6
