# Supplementary material for: Differential expression profile of gluten-specific T cells identified by single-cell RNA-seq
Source: PLoS One. 2021 Oct 7;16(10):e0258029. doi: 10.1371/journal.pone.0258029 (PMC8496852; doi:10.1371/journal.pone.0258029)
Supplement: S5 Table — (XLSX) [file pone.0258029.s005.xlsx]

## Sheet: S_table5.Signatures for Th cell
Supplementary table 5. List of genes used as signatures for T helper cell subset
Th1	CXCR3	ZBTB32	IL18RAP	CCR5	IL18R1	IFNG	IL12RB2	IL27RA	STAT1	STAT4	TBX21
Th2	IL5	CCL5	GATA3	IL13RA1	IL4	IL24	IL9	CCR8	IL4RA	STAT6	PPARG	CCR4	CCR3	CCL11	IL13
Th17	IL22	IL17F	IL17A	STAT3	CCR6	CSF2	BATF	IL23R	IL1R1	MINA	IL21	RORC	SMARCA4	IL12RB1	CCL20	SOCS3
Treg	FOXP3	SMAD3	GPR83	ITGAE	TGFB1
TFH	BCL6	CXCR5	PDCD1	ICOS	IL21	IL21R	CD40LG	SH2D1A	TIGIT	ASCL2	MAF	STAT3	BATF	IRF4	BTLA
